# Supplementary material for: mTORC1 activation in presumed classical monocytes: observed correlation with human size variation and neuropsychiatric disease
Source: publisher site journal article supplement (doi:10.18632/aging.206033), 2024-07-26
Supplement: Supplementary file [file aging-v16i14-206033-supplementary-material-SD2.pdf]

## SUPPLEMENTARY TABLES

**Supplementary Table 1. Clinical parameters and corresponding AUC values for ketamine response prediction.**

| <b>Clinical parameter</b>                | <b>AUC (95% CI)</b> |
|------------------------------------------|---------------------|
| Phosphorylated p70S6K                    | 0.80 (0.53–0.97)    |
| Ratio phosphorylated p70S6K/total p70S6K | 0.78 (0.59–0.94)    |
| Weight                                   | 0.76 (0.54–0.93)    |
| Head circumference                       | 0.74 (0.50–0.93)    |
| Pupil Distance                           | 0.74 (0.50–0.93)    |
| Waist circumference                      | 0.74 (0.48–0.93)    |
| AQ-10 score                              | 0.73 (0.51–0.91)    |
| BMI                                      | 0.72 (0.52–0.91)    |
| Ratio head circumference/BMI             | 0.72 (0.48–0.90)    |
| GAD-7 score                              | 0.67 (0.47–0.91)    |
| Height                                   | 0.66 (0.48–0.91)    |
| Ratio waist circumference/height         | 0.64 (0.45–0.91)    |
| KSP-6 score                              | 0.61 (0.45–0.90)    |
| Age                                      | 0.58 (0.42–0.90)    |
| p70S6K expression                        | 0.51 (0.41–0.90)    |

AUC, area under the curve; AQ-10, 10-item Autism Spectrum Quotient; BMI, body mass index; CI, confidence interval; GAD-7, 7-item Generalized Anxiety Disorder; KSP-6, Karolinska Scales of Personality.

**Supplementary Table 2. Ranking of clinical parameters based on random forest modelling.**

| <b>Clinical parameter</b>                | <b>Mean decrease accuracy</b> |
|------------------------------------------|-------------------------------|
| Phosphorylated p70S6K                    | 0.034579                      |
| Height                                   | 0.011966                      |
| Ratio head circumference/BMI             | 0.010941                      |
| AQ-10 score                              | 0.00569                       |
| BMI                                      | 0.003914                      |
| GAD-7 score                              | 0.002192                      |
| Head circumference                       | 0.001602                      |
| Weight                                   | 0.001418                      |
| Pupil distance                           | -0.00026                      |
| Ratio waist circumference/height         | -0.00054                      |
| Age                                      | -0.00058                      |
| Ratio Phosphorylated p70S6K/total p70S6K | -0.00087                      |
| p70S6K expression                        | -0.00336                      |
| KSP-6 score                              | -0.00511                      |
| Waist circumference                      | -0.00824                      |
